# Supplementary material for: Magnetically responsive photonic watermarks on banknotes
Source: Royal Society of Chemistry journal article supplement (doi:10.1039/c3tc32228a), 2014-01-01
Supplement: c3tc32228a.pdf [file c3tc32228a.pdf]

## Magnetically Responsive Photonic Watermark on Banknotes

Haibo Hu,<sup>a</sup> Hao Zhong,<sup>b</sup> Changle Chen,<sup>\*c</sup> Qianwang Chen,<sup>\*a</sup>

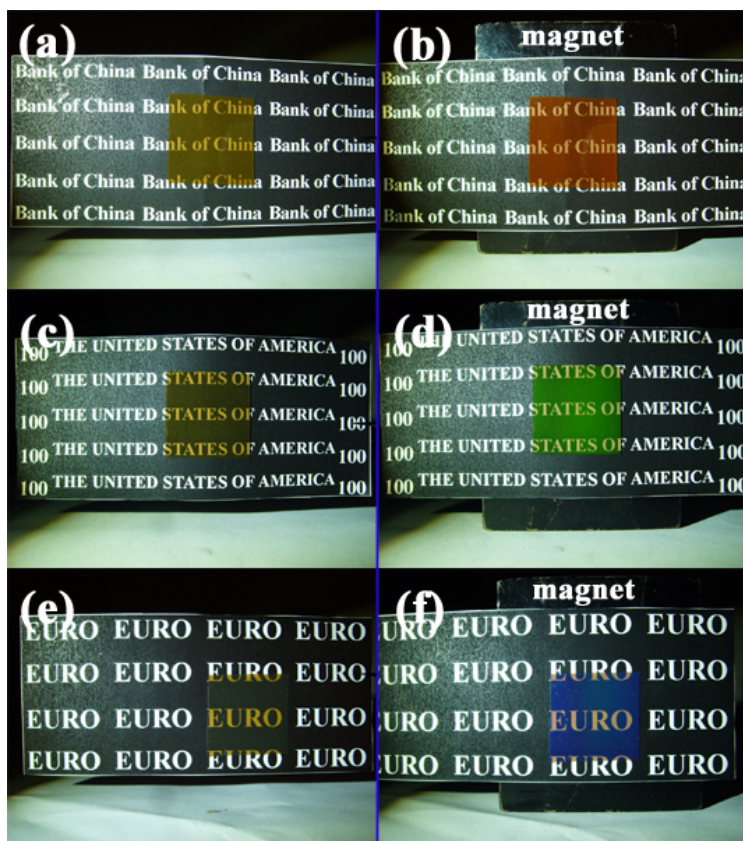

**Figure S1.** Digital photographs of the obtained double-layer flexible photonic display films containing carbon-capped superparamagnetic colloidal nanoparticles with different average particle size (a), (b) 190 nm, (c), (d) 135 nm and (e), (f) 115 nm.

<sup>a</sup> Hefei National Laboratory for Physical Sciences at Microscale and Department of Materials Science & Engineering, University of Science and Technology of China, Hefei, 230026, China. E-mail: [cqw@ustc.edu.cn](mailto:cqw@ustc.edu.cn); Fax: +86-551-63603005; Tel: +86-551-63607251

<sup>b</sup> Department of Materials of Science and Engineering, University of Science and Technology of China, Hefei, 230026, China

<sup>c</sup> CAS Key Laboratory of Soft Matter Chemistry and Department of Polymer Science and Engineering, University of Science and Technology of China, Hefei, 230026, China. E-mail: [changle@ustc.edu.cn](mailto:changle@ustc.edu.cn)

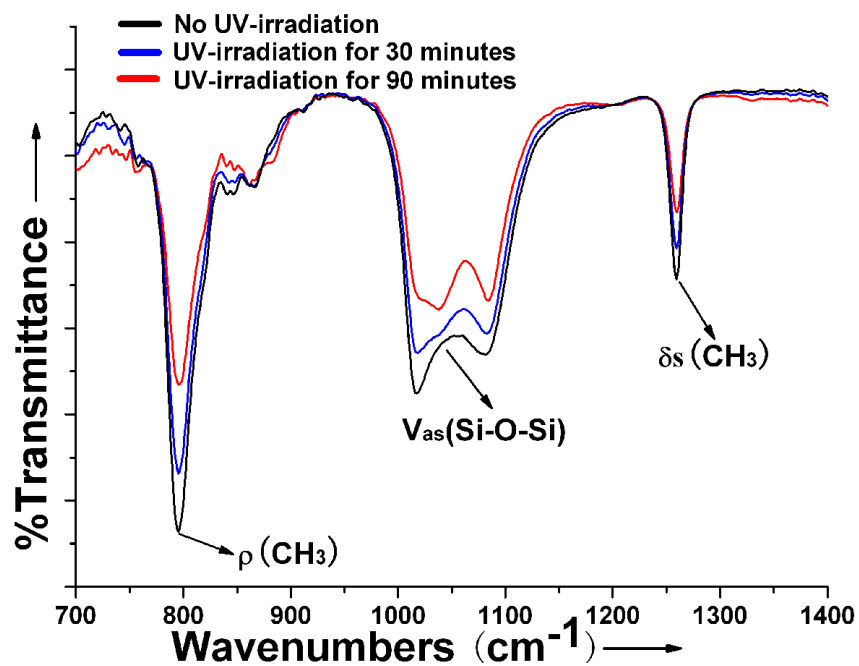

**Figure S2.** The FTIR spectra of the surface of second photonic-display-layer with different UV-irradiation time: Definitions:  $\delta_{\text{s}}(\text{CH}_3)$ : symmetrical bending of  $\text{CH}_3$ ,  $\rho(\text{CH}_3)$ :  $\text{CH}_3$  rocking,  $\text{v}_{\text{as}}(\text{Si-O-Si})$ : stretching vibrations of  $\text{Si-O-Si}$  bond.
